# Supplementary material
Source: PubMed Central journal article supplement (PMC4159147)
Supplement: supp_ddu215_ddu215supp.pdf [file supp_ddu215_ddu215supp.pdf]

## **SUPPLEMENTAL MATERIALS**

Misra C., Chang, S-W., et. al.

Disruption of myocardial Gata4 and Tbx5 results in defects in cardiomyocyte proliferation and atrioventricular septation

## SUPPLEMENTAL FIGURE LEGENDS

**Supplemental Figure S1. *Gata4* and *Tbx5* are co-expressed in developing endocardial cushions at E11.5 but not E14.5.** Immunofluorescent staining for *Gata4* (A,D) and *Tbx5* (B,E) in E11.5 (A-C) and E14.5 (D-F) endocardial cushions demonstrates co-localization at E11.5 but not E14.5.

**Supplemental Figure S2. *Gata4;Tbx5* compound heterozygote embryos display reduced endocardial cushion cell numbers at E12.5 and E13.5.** Quantification of atrioventricular cushion number in *Gata4;Tbx5* compound heterozygotes at E11.5 (A), E12.5 (B) and E13.5 (C). \*, p value <0.05 comparison to wild type; #, p value <0.05 comparison between single heterozygotes and double heterozygotes.

**Supplemental Figure S3. Dorsal mesenchymal protrusion (DMP) is absent in *Tbx5* heterozygote and *Gata4;Tbx5* compound heterozygote embryos at E11.5 as compared to wildtype and *Gata4* heterozygotes.** \*, DMP.

**Supplemental Figure S4. Expression of *Gata4* was reduced in *Gata4<sup>MyoDel/wt</sup>;Tbx5<sup>+/-</sup>* (*Gata4<sup>flox/wt</sup>;Tbx5<sup>wt/-</sup>;αMHC-Cre<sup>+</sup>*) embryos in the atria and ventricle. (A-H)** Immunohistochemistry staining reveals the loss of *Gata4* expression in the atrial and ventricular myocardium in *Gata4<sup>MyoDel/wt</sup>;Tbx5<sup>+/-</sup>* embryos. Endocardial expression is maintained (arrows). Scale bars indicate 200 μm.

**Supplemental Figure S5. Haploinsufficiency of *Tbx5* and endocardial-*Gata4* (*Gata4*<sup>EndoDel/wt</sup>;*Tbx5*<sup>+/-</sup>) showed normal cardiac phenotype and cardiomyocyte proliferation.**

(A) Survival table for *Gata4*<sup>EndoDel/wt</sup>;*Tbx5*<sup>+/-</sup> (*Gata4*<sup>flox/wt</sup>;*Tbx5*<sup>wt/-</sup>;Tie2-Cre<sup>+</sup>) embryos at E11.5-E16.5. (B) Images and histologic sections of E14.5 embryos show no growth retardation and normal septation in *Gata4*<sup>EndoDel/wt</sup>;*Tbx5*<sup>+/-</sup> mutants. There was normal myocardial proliferation as measured by phospho-histone H3 staining (C-O). \*, p value < 0.05. Scale bars indicate 200  $\mu$ m.

**Supplemental Figure S6. Knockdown of *Gata4* and *Tbx5* using siRNA in cultured cardiomyocytes shows decreased expression of *Cdk4* and reduced *Ki67* expression.**

(A) Decreased expression of *Cdk4* by immunoblotting in cultured E11.5 murine cardiomyocytes after knockdown of *Gata4* and *Tbx5* with *Gata4* and *Tbx5*-specific siRNA. Immunoblot for *Gata4* and *Tbx5* is shown to demonstrate efficiency of siRNA. Actin expression is shown as loading control. (B) Immunofluorescence staining demonstrates decreased *Ki67* expression in cultured cardiomyocytes, consistent with reduced cardiomyocyte proliferation. Scale bars indicate 200  $\mu$ m.

**Supplemental Figure S7. Table summarizing published ChIP-seq studies using *Gata4* and *Tbx5* in adult hearts and HL-1 cardiomyocytes.**

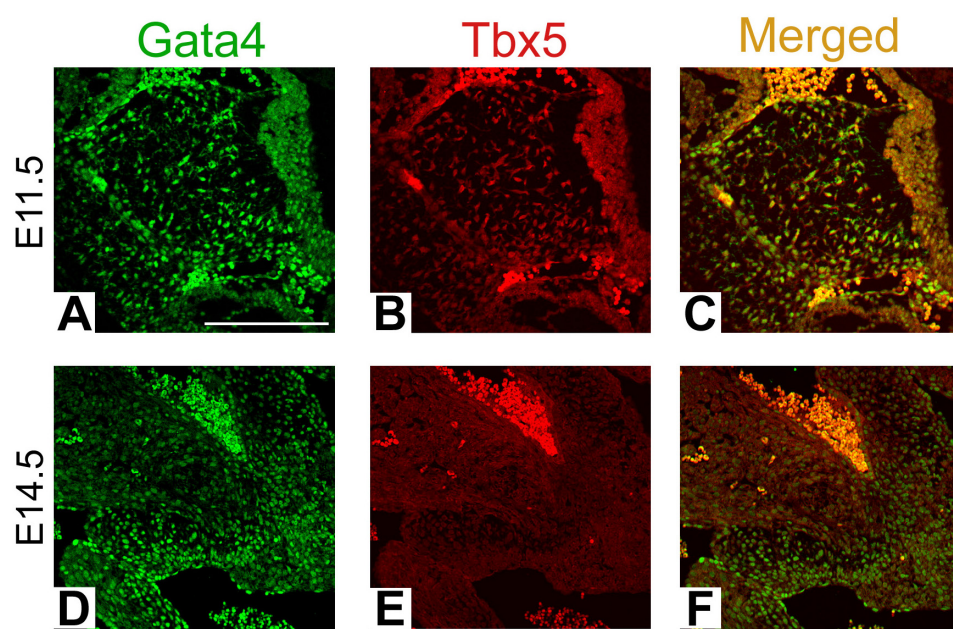

Supplemental Figure 1.

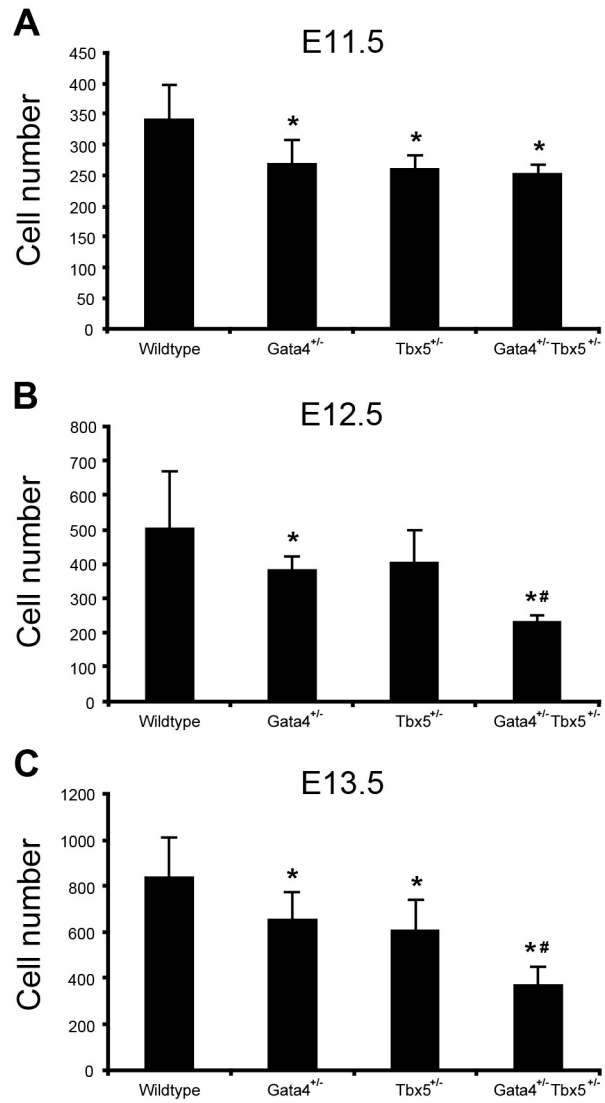

Supplemental Figure 2.

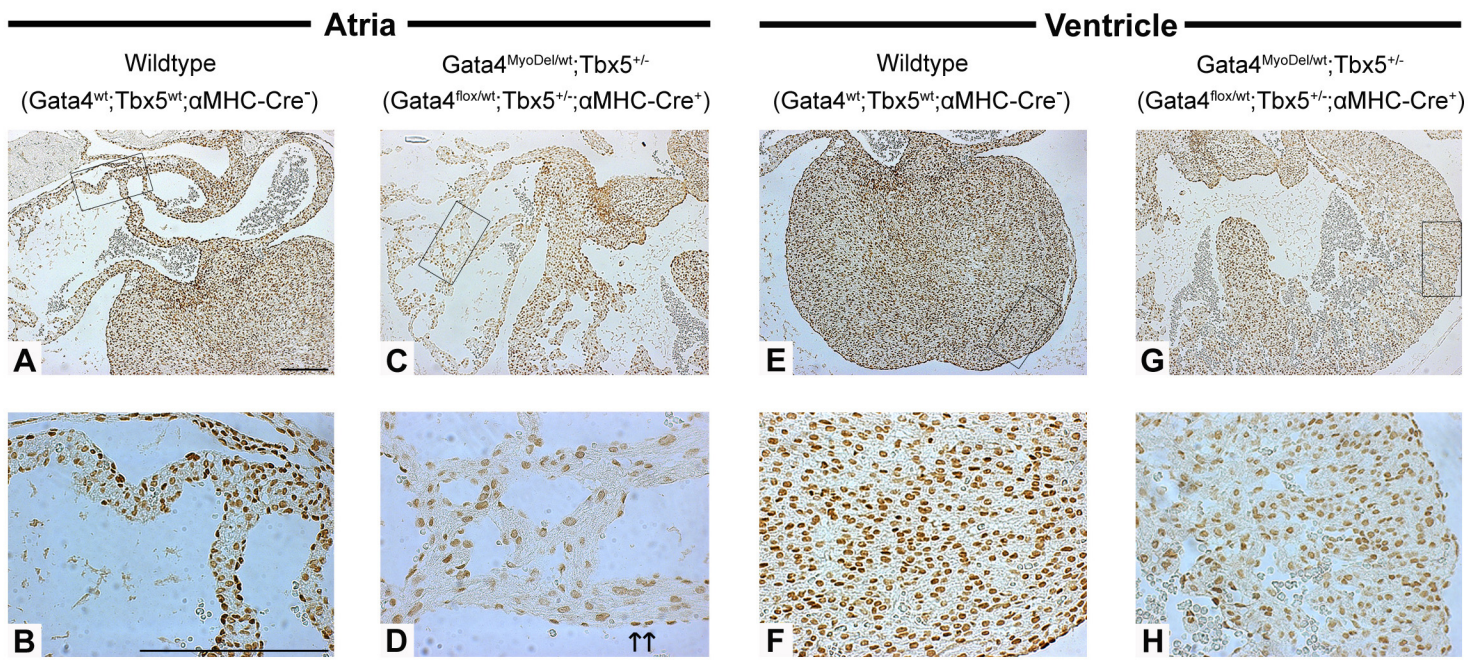

Supplemental Figure 4.

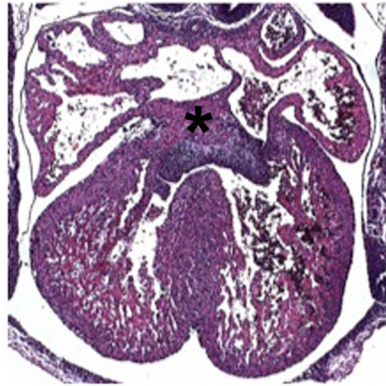

Wildtype

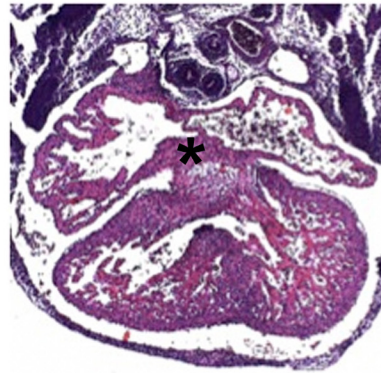

*Gata4*<sup>+/-</sup>

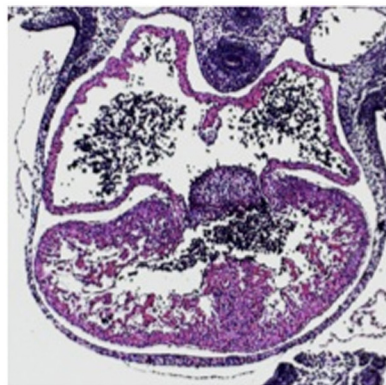

*Tbx5*<sup>+/-</sup>

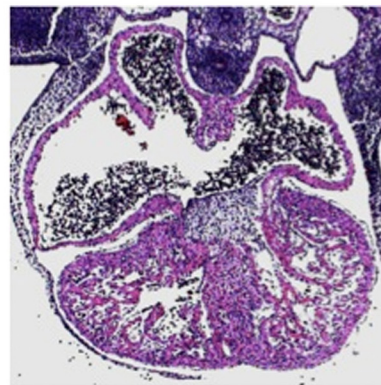

*Gata4*<sup>+/-</sup>; *Tbx5*<sup>+/-</sup>

Supplemental Figure 3.

**A**  $Gata4^{flox/wt} \times Tbx5^{wt/-}; Tie2-Cre^+$

|                               | wt       | wt      | wt      | wt      | flox    | flox    | flox   | flox    |
|-------------------------------|----------|---------|---------|---------|---------|---------|--------|---------|
| <i>Gata4</i>                  | wt       | wt      | wt      | wt      | flox    | flox    | flox   | flox    |
| <i>Tbx5</i>                   | wt       | wt      | -       | -       | wt      | wt      | -      | -       |
| <i>Tie2-Cre</i>               | -        | +       | -       | +       | -       | +       | -      | +       |
| E11.5-E16.5                   | 10 (15%) | 8 (13%) | 9 (14%) | 8 (13%) | 8 (13%) | 9 (14%) | 5 (8%) | 6 (10%) |
| Expected Mendelian percentage | 12.5%    | 12.5%   | 12.5%   | 12.5%   | 12.5%   | 12.5%   | 12.5%  | 12.5%   |

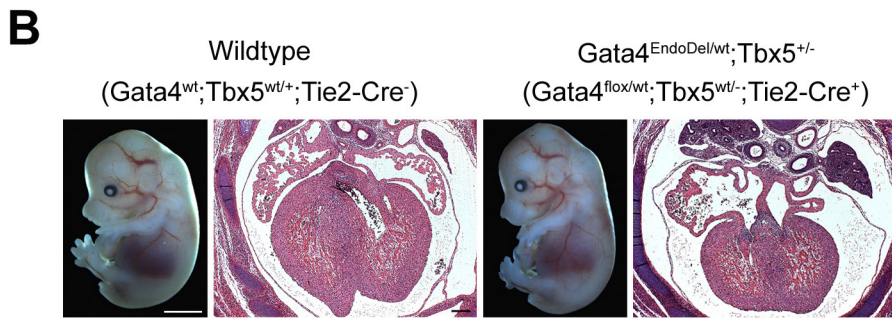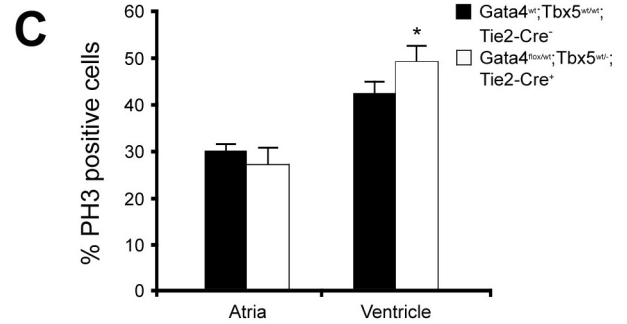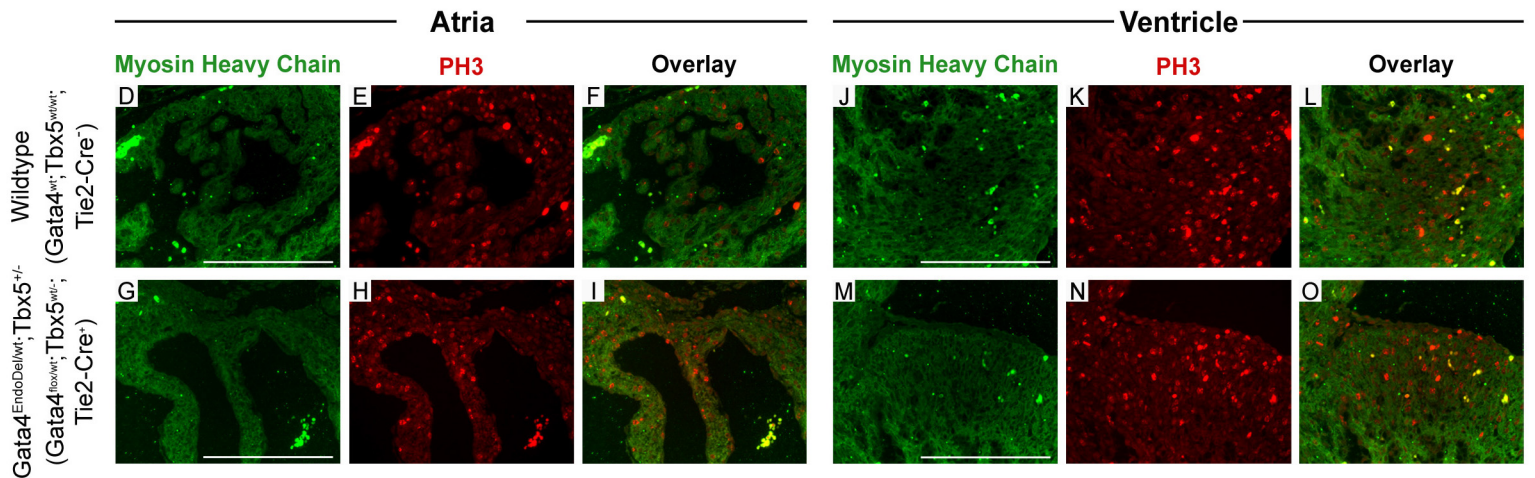

Supplemental Figure 5.



**A**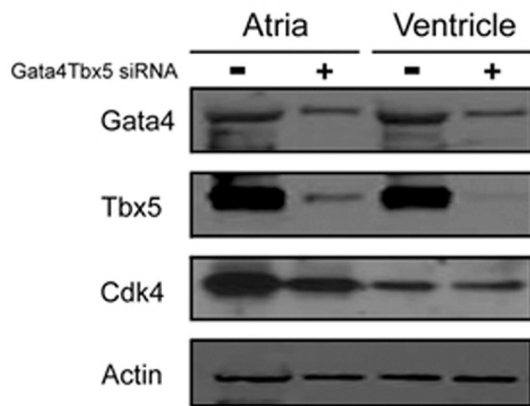**B**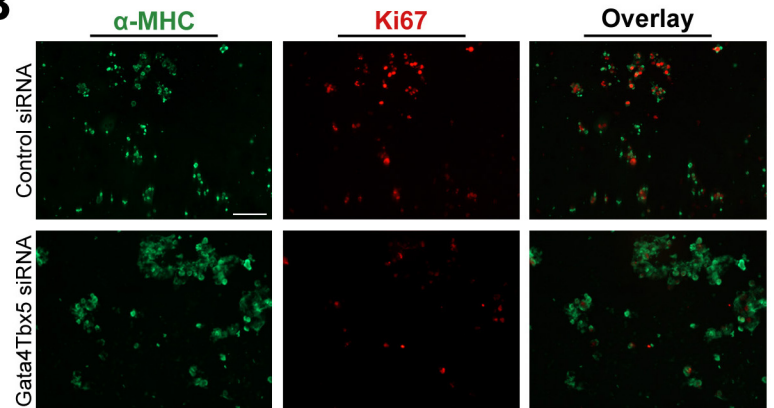

Supplemental Figure 6.

### Gata4

| Dataset (GEO#) | Tissue                  | Cell line  | CDK4 | CDK2 | Reference                             |
|----------------|-------------------------|------------|------|------|---------------------------------------|
| GSE 35151      | Adult mouse whole heart |            | —    | —    | van den Boogaard <i>et al.</i> , 2012 |
| GSM 862697     | Adult mouse whole heart |            | —    | —    |                                       |
| GSE 21529      |                         | HL-1 cells | —    | —    | He <i>et al.</i> , 2011               |

### Tbx5

| Dataset (GEO#) | Tissue | Cell line  | CDK4 | CDK2 | Reference               |
|----------------|--------|------------|------|------|-------------------------|
| GSE 21529      |        | HL-1 cells | +    | —    | He <i>et al.</i> , 2011 |
| GSM 558908     |        | HL-1 cells | —    | —    |                         |

Supplemental Figure 7.

Supp Table 1. Primer sequences for gene expression

| Gene name    | Primer sequence          |
|--------------|--------------------------|
| q-PCR        |                          |
| Mouse CDK2 F | CTGCCATTCTCACCGTGTCC     |
| Mouse CDK2 R | AGCTTGATGGACCCCTCTGC     |
| Mouse CDK4 F | CGAGCGTAAGATCCCCTGCT     |
| Mouse CDK4 R | GCACCGACACCAATTCAGC      |
| ChIP         |                          |
| Mouse CDK2 F | TCCAAAAGCAGGCGAGAGT      |
| Mouse CDK2 R | TCCACCTGGACAAGAGAGTCT    |
| Mouse CDK4 F | GTTGGCCCGGTTGCCATGACACCG |
| Mouse CDK4 R | CTGGACACGTGATCTTCACCCTTG |
